# Supplementary material for: Cohesin-Mediated Genome Architecture Does Not Define DNA Replication Timing Domains
Source: PubMed Central journal article supplement (PMC6471042; doi:10.3390/genes10030196), 2019-03-04
Supplement: genes-10-00196-s001.pdf [file genes-10-00196-s001.pdf]

# Supplemental

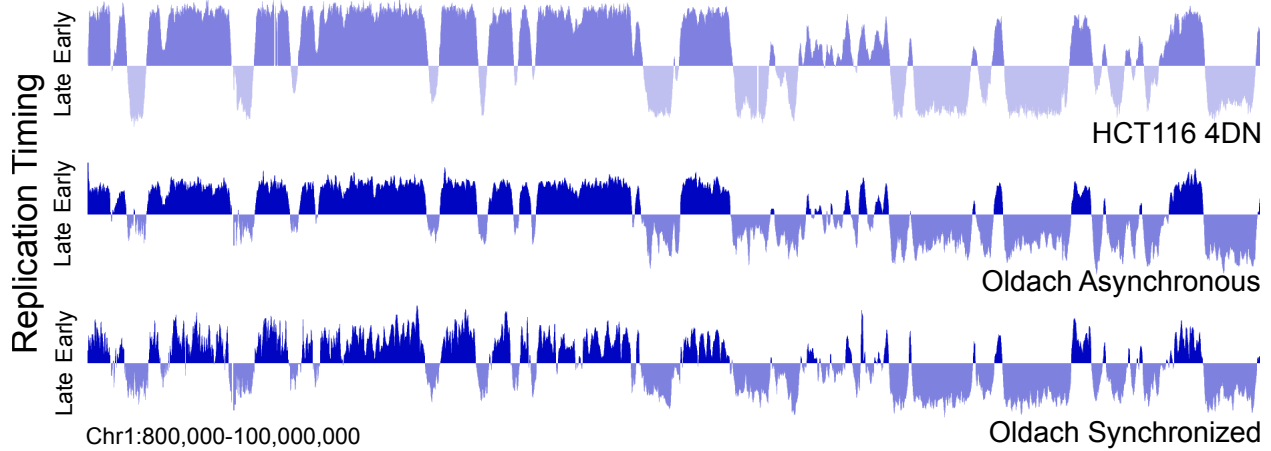

**Supplemental Figure 1. Newly generated RepliSeq data agrees with previously published RepliSeq data for HCT116 cells.** Example locus overlay of replication timing (RT, log-scaled ratio of read counts in early over late S phase bins) for untreated HCT116 cells from the asynchronous and synchronized experiments, compared to independent HCT116 data from the 4D Nucleome portal.

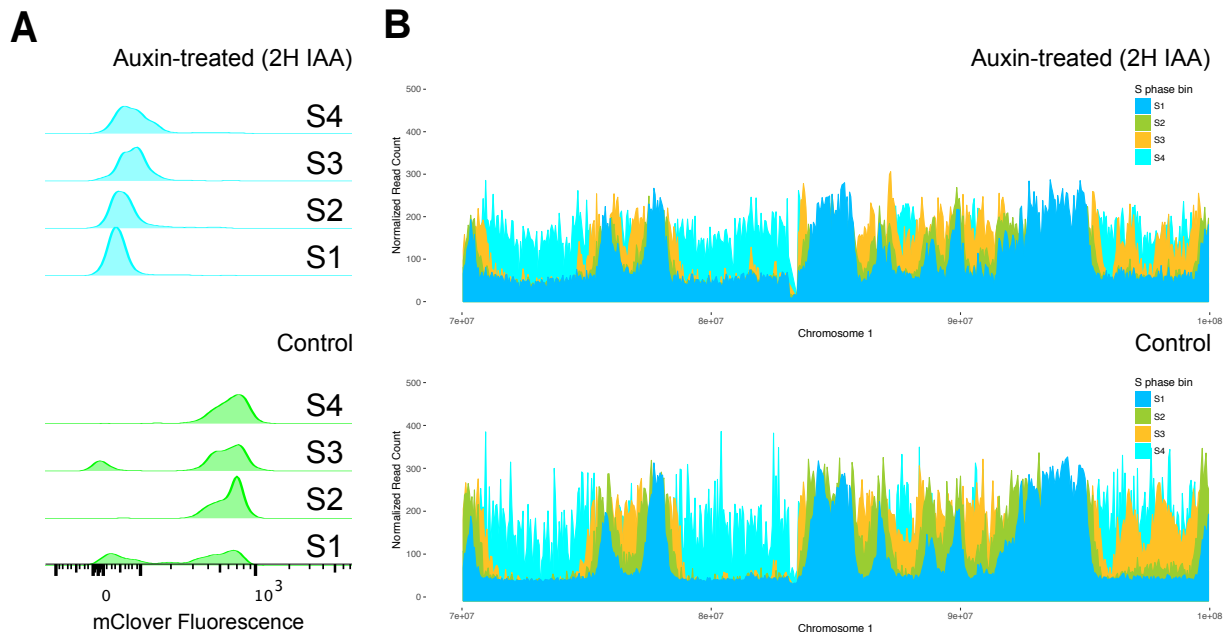

**Supplemental Figure 2. Sample preparation for asynchronous RepliSeq experiment.** A. Auxin-treated cells showed loss of cohesin as assayed by loss of mClover signal. B. In asynchronous sorted samples BrdU incorporation proceeds outward from specific peaks in the early S phase (S1) sample to pan-genome incorporation in the late S (S4) sample.

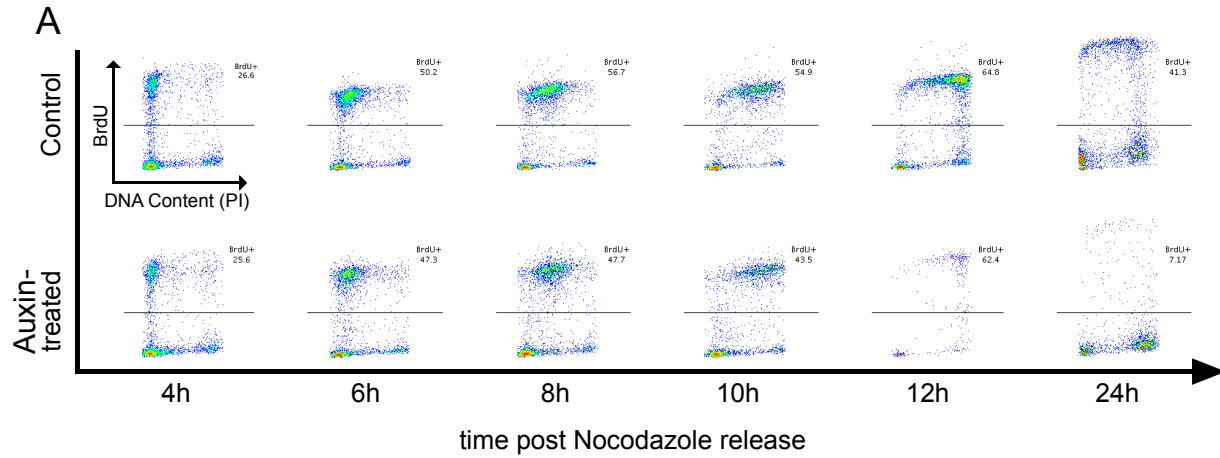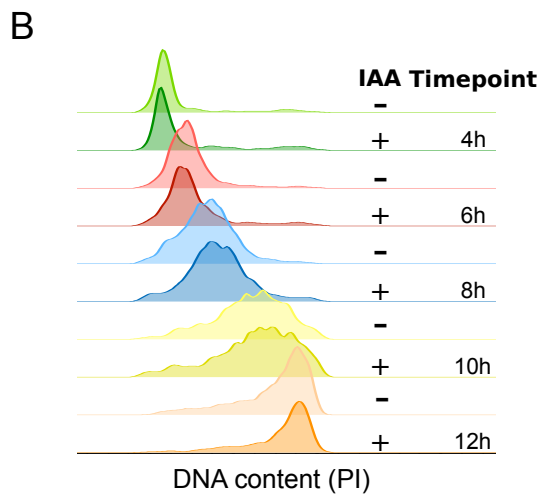

**Supplemental Figure 3. Auxin treatment post release from nocodazole by mitotic shake-off does not perturb synchronous progression through S phase.** A. Flow cytometry data for DNA content versus BrdU signal showing progression through S phase upon release from nocodazole by mitotic shake-off. B. DNA content as quantified by PI signal for BrdU (+) gated cell populations of auxin-treated or control samples at varying timepoints following mitotic shake-off.

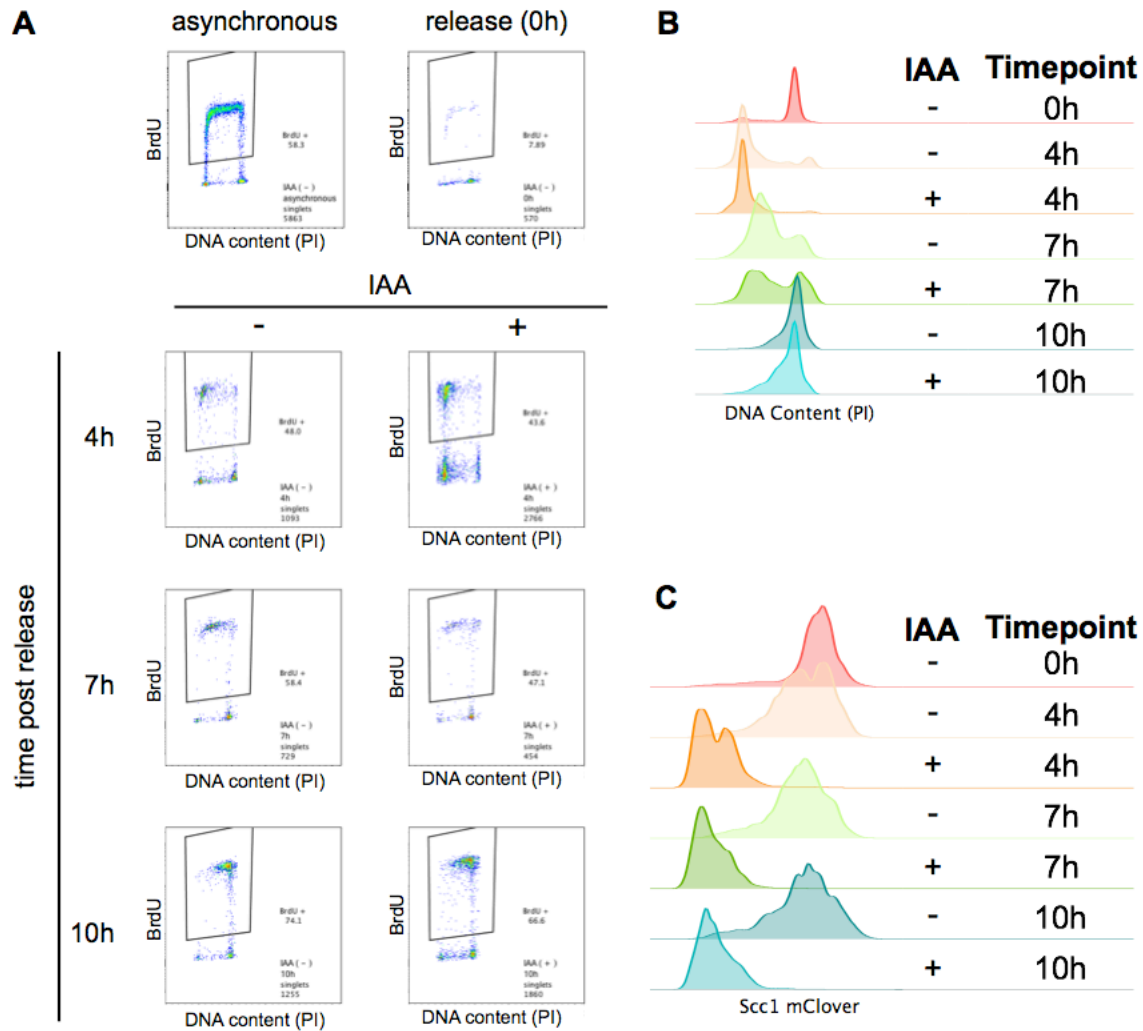

**Supplemental Figure 4. Sample preparation for synchronous RepliSeq experiment A.** Samples were collected at 4, 7, and 10 hours post-release to assess replication timing in early, mid, and late S phase, respectively. B. Flow profile gated on BrdU (+) singlets show synchronous progression through S phase. (0h post release sample not gated for BrdU (+) cells). C. Loss of Sccl in synchronized samples was confirmed via loss of mClover signal.

## Asynchronous

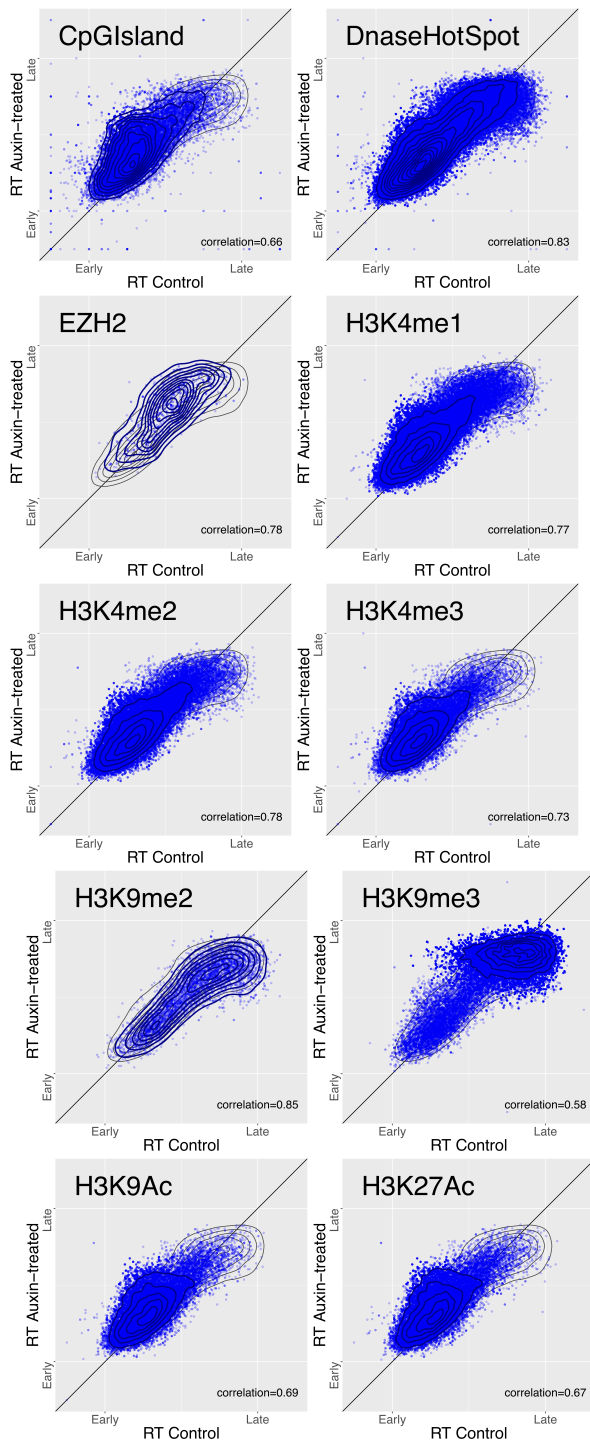

## Synchronized

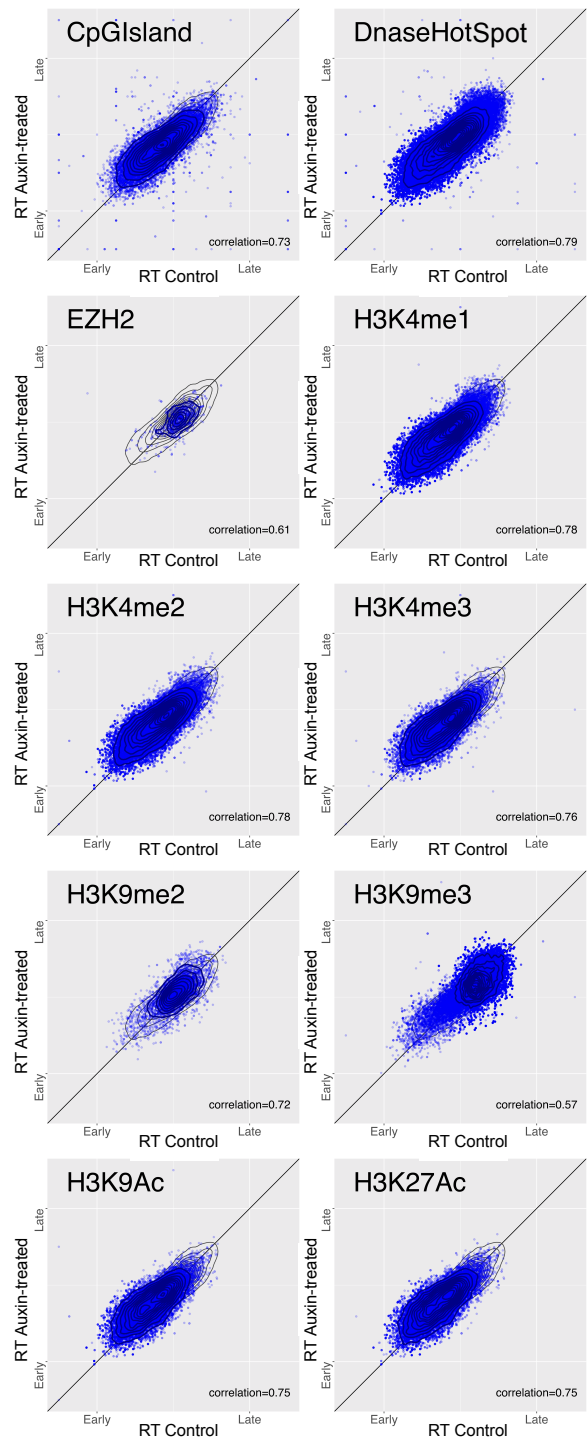

**Supplemental Figure 5.** Additional plots of control versus auxin-treated replication timing at genomic loci with chromatin states or protein binding sites associated with characteristically early or late replication timing.



example loci significantly changed in :

Asynchronous

Synchronized

Both

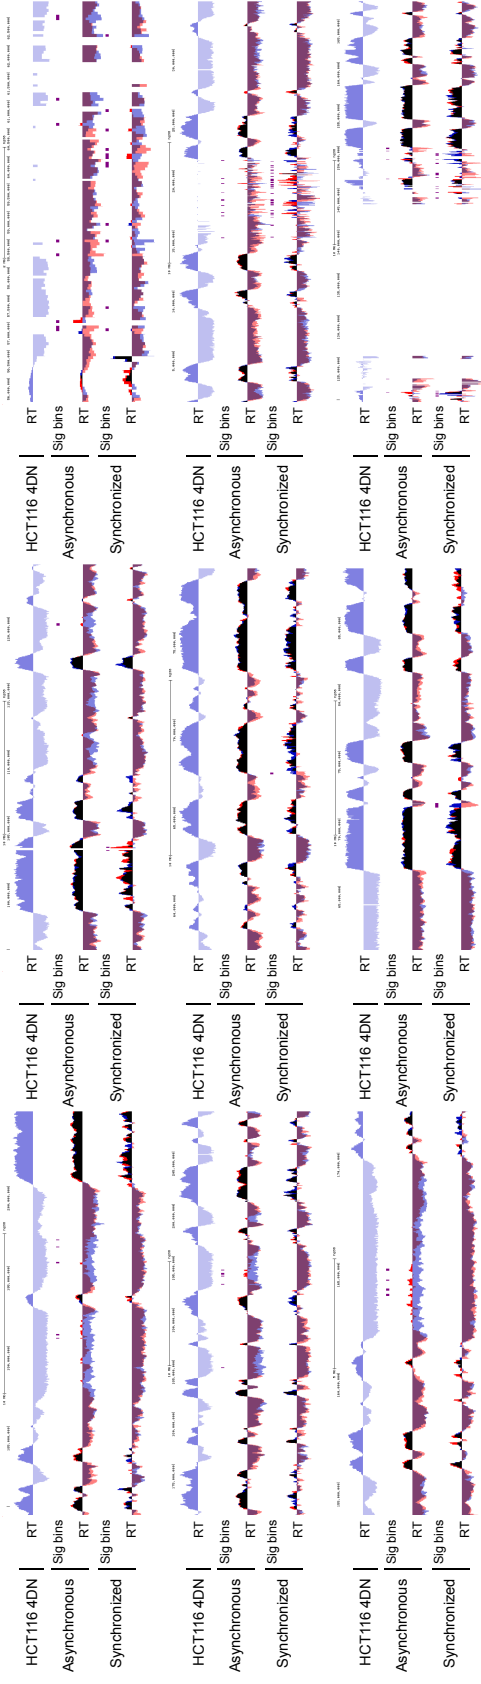

**Supplemental Figure 6. Loci with significant changes to replication timing, in asynchronous, synchronized, or both experiments. Significance determined by FDR adjusted  $p$  value  $< 0.05$ .**

**Supplemental Table 1.** Source for genomic features annotated in HCT116 cells.

| <b>Feature</b>  | <b>Source</b>                                                                          |
|-----------------|----------------------------------------------------------------------------------------|
| Super enhancers | (Hnisz <i>et al</i> , 2013) [45]                                                       |
| H3K9me3         | ENCSR179BUC                                                                            |
| H3K9me2         | ENCSR555LYM                                                                            |
| CTCF            | ENCSR000BSE                                                                            |
| H3K27Ac         | ENCSR000EUT                                                                            |
| H3K9Ac          | ENCSR093SHE                                                                            |
| H3K4me3         | ENCSR333OPW                                                                            |
| H3K4me2         | ENCSR794ULT                                                                            |
| H3K4me1         | ENCSR161MXP                                                                            |
| H4K20me1        | ENCSR474DOV                                                                            |
| H2AFZ           | ENCSR227XNT                                                                            |
| EZH2            | ENCSR046HGP                                                                            |
| Dnase Hotspot   | wgEncodeRegDnaseUwHCT116Peak (Sabo <i>et al</i> , 2006) [46]<br>via UCSC Table Browser |
| CpG Island      | cpgIslandExt via UCSC Table Browser                                                    |
